# Supplementary material for: Self-assembling PVA-F127 thermosensitive nanocarriers with highly sensitive magnetically-triggered drug release for epilepsy therapy in vivo
Source: Royal Society of Chemistry journal article supplement (doi:10.1039/c2jm00032f), 2012-01-01
Supplement: c2jm00032f.pdf [file c2jm00032f.pdf]

# Supporting Information

## Self-Assembling PVA-F127 Thermosensitive Nanocarriers with Highly Sensitive Magnetically-Triggered Drug Release for Epilepsy Therapy *in Vivo*

Hsin-Yang Huang<sup>1</sup>, Shang-Hsiu Hu<sup>1</sup>, Chih-Shang Chian<sup>1</sup>, San-Yuan Chen<sup>1,\*</sup> Hsin-Yi  
Lai<sup>1</sup> and You-Yin Chen<sup>2,\*</sup>

<sup>1</sup>Department of Materials Science and Engineering, National Chiao Tung University,  
No. 1001, Ta-Hsueh Rd., Hsinchu, Taiwan 300, R.O.C.

<sup>2</sup>Department of Biomedical Engineering, National Yang Ming University, No.155, Sec.  
2, Linong St., Taipei, Taiwan 112, R.O.C.

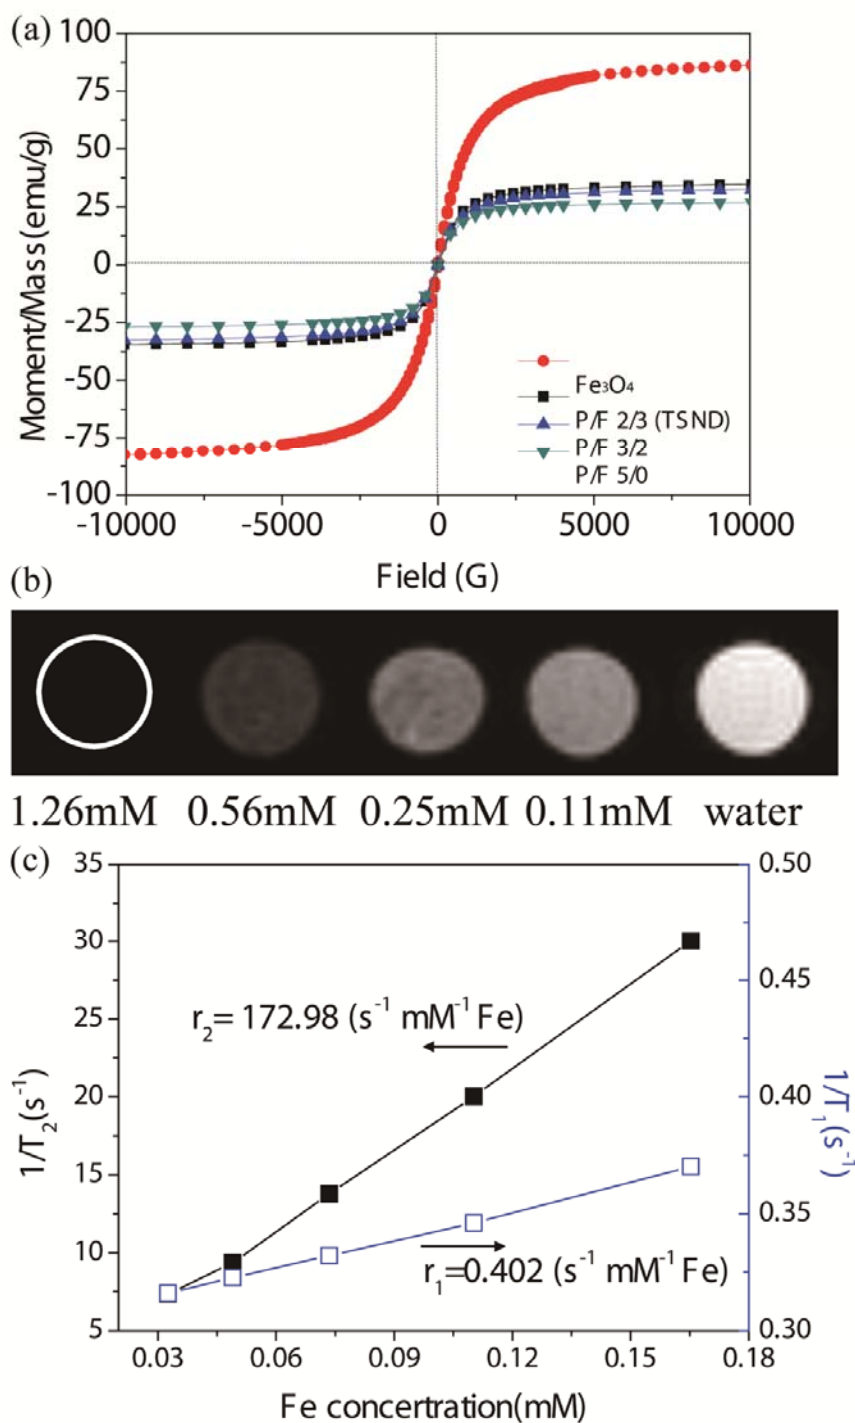

**Figure S1.** (a) Field-dependent magnetization curves of as-synthesized Fe<sub>3</sub>O<sub>4</sub> nanoparticles and various compositions of TSNC-2 at room temperature. (b) T<sub>2</sub>-weighted MR images of the aqueous dispersion at different Fe concentrations. (c) T<sub>1</sub> and T<sub>2</sub> relaxation rates (1/T<sub>1</sub>, 1/T<sub>2</sub>) as a function of iron molar concentration obtained at 25 °C using a 7 T MR scanner.
